## Correction: The role of indoxyl sulfate in renal anemia in patients with chronic kidney disease

Chih-Jen Wu<sup>1,2,3</sup>, Cheng-Yi Chen<sup>1,8,11</sup>, Thung-S. Lai<sup>4</sup>, Pei-Chen Wu<sup>1</sup>, Chih-Kuang Chuang<sup>5,6,7</sup>, Fang-Ju Sun<sup>8,9</sup>, Hsuan-Liang Liu<sup>5</sup>, Han-Hsiang Chen<sup>1,8</sup>, Hung-I. Yeh<sup>10</sup>, Chih-Sheng Lin<sup>11</sup> and Cheng-Jui Lin<sup>1,5,8</sup>

<sup>1</sup> Division of Nephrology, Department of Internal Medicine, Mackay Memorial Hospital, Mackay Medical College, Taipei, Taiwan

<sup>2</sup> Department of Medical Research, China Medical University Hospital, China Medical University, Taichung, Taiwan

<sup>3</sup> Graduate Institute of Medical Sciences and Department of Pharmacology, School of Medicine, College of Medicine, Taipei Medical University, Taipei, Taiwan

<sup>4</sup> Graduate Institute of Biomedical Science, Mackay Medical College, New Taipei City, Taiwan

<sup>5</sup> Institute of Biotechnology, National Taipei University of Technology, Taipei, Taiwan

<sup>6</sup> Division of Genetics and Metabolism, Department of Medical Research, Mackay Memorial Hospital, Taipei, Taiwan

<sup>7</sup> College of Medicine, Fu-Jen Catholic University, Taipei, Taiwan

<sup>8</sup> Mackay Junior College of Medicine, Nursing and Management, Taipei, Taiwan

<sup>9</sup> Department of Medical Research, Mackay Memorial Hospital, Taipei, Taiwan

<sup>10</sup> Department of Medicine, Mackay Medical College, New Taipei City, Taiwan

<sup>11</sup> Department of Biological Science and Technology, National Chiao Tung University, Hsinchu, Taiwan

**Published:** March 08, 2019

**Copyright:** Wu et al. This is an open-access article distributed under the terms of the Creative Commons Attribution License 3.0 (CC BY 3.0), which permits unrestricted use, distribution, and reproduction in any medium, provided the original author and source are credited.

**This article has been corrected:** The correct affiliation information is given below:

<sup>11</sup> Department of Biological Science and Technology, National Chiao Tung University, Hsinchu, Taiwan

Original article: Oncotarget. 2017; 8:83030-83037. <https://doi.org/10.18632/oncotarget.18789>
